# Supplementary material for: VE-cadherin enables trophoblast endovascular invasion and spiral artery remodeling during placental development
Source: eLife. 2022 Apr 29;11:e77241. doi: 10.7554/eLife.77241 (PMC9106330; doi:10.7554/eLife.77241)
Supplement: Figure 1—figure supplement 1—source data 1. [file elife-77241-fig1-figsupp1-data1.xlsx]

## Sheet: Fig 1-Fig Supp 1
Figure 1-Figure Supp 1A
VE-cad+CK8+ Area (% of CK8+)
Control	Cdh5fl/+ or Cdh5fl/fl	56.0811	61.1664	79.0478
	CYP19A1(Tg)Cre; Cdh5fl/+	47.2278
Cdh5 KO	CYP19A1(Tg)Cre; Cdh5fl/fl	12.2603	9.37331	20.8255
P-value	0.00262398
Figure 1-Figure Supp 1B
Placenta Weight (mg)
Control	Cdh5fl/+ or Cdh5fl/fl	65.7	58.5	54	54.4	56.5
	CYP19A1(Tg)Cre; Cdh5fl/+	79	53.8	56.8	53	66.5	64.8
P-value	0.356466
Figure 1-Figure Supp 1C
Embryo Weight (mg)
Control	Cdh5fl/+ or Cdh5fl/fl	72.8	74.4	82.5	96.6	69.9
	CYP19A1(Tg)Cre; Cdh5fl/+	72.8	82.6	75.9	76.6	77.2	96.7
P-value	0.863678
