# Supplementary material for: VE-cadherin enables trophoblast endovascular invasion and spiral artery remodeling during placental development
Source: eLife. 2022 Apr 29;11:e77241. doi: 10.7554/eLife.77241 (PMC9106330; doi:10.7554/eLife.77241)
Supplement: Figure 1—figure supplement 2—source data 1. [file elife-77241-fig1-figsupp2-data1.xlsx]

## Sheet: Fig 1-Fig Supp 2
Figure 1-Figure Supp 2B
Liver Area (% of Total Area)
Control	Cdh5fl/+ or Cdh5fl/fl	8.20252	5.90031	7.64137
	CYP19A1(Tg)Cre; Cdh5fl/+	5.58721
Cdh5 KO	CYP19A1(Tg)Cre; Cdh5fl/fl	4.66003	3.67189	4.79066
P-value	0.0239784
Figure 1-Figure Supp 2D
Myocardial Thickness (um)
Control	Cdh5fl/+ or Cdh5fl/fl	90.06	104.26	69.977	88.9	85.87
	CYP19A1(Tg)Cre; Cdh5fl/+	85.353	93.61	95.71	95.41	91.16	100.67
Cdh5 KO	CYP19A1(Tg)Cre; Cdh5fl/fl	33.286	47.909	53.163	33.46	48.18
P-value	1.41197e-05
