# Supplementary material for: VE-cadherin enables trophoblast endovascular invasion and spiral artery remodeling during placental development
Source: eLife. 2022 Apr 29;11:e77241. doi: 10.7554/eLife.77241 (PMC9106330; doi:10.7554/eLife.77241)
Supplement: Figure 1—figure supplement 3—source data 1. [file elife-77241-fig1-figsupp3-data1.xlsx]

## Sheet: Figure 1-Fig Supp 3
Figure 1-Figure Supp 3D
VE-cadherin Mean Fluorescence Intensity (Fold Change)
		Brain	Heart	Liver	Lungs	Thorax
Control	Cdh5fl/+ or Cdh5fl/fl	0.96465	0.978332	1.0602	0.919859	0.711477
		1.12009	0.916788	0.877723	0.802322	1.64531
		0.835987	1.01056	1.05132	1.3815	0.706868
	CYP19A1(Tg)Cre; Cdh5fl/+	1.07927	1.09432	1.01076	0.896319	0.936344
Cdh5 KO	CYP19A1(Tg)Cre; Cdh5fl/fl	1.20206	0.926997	1.13108	1.32079	1.25499
		1.05155	0.946529	0.95556	1.35842	0.844455
		0.79622	1.10374	0.938711	1.01973	0.723114
P-value		0.909204	0.915922	0.915547	0.224711	0.837681
