# Supplementary material for: VE-cadherin enables trophoblast endovascular invasion and spiral artery remodeling during placental development
Source: eLife. 2022 Apr 29;11:e77241. doi: 10.7554/eLife.77241 (PMC9106330; doi:10.7554/eLife.77241)
Supplement: Figure 1—source data 1. [file elife-77241-fig1-data1.xlsx]

## Sheet: Figure 1
Figure 1D
Placenta Weight (mg)
Control	Cdh5fl/+ or Cdh5fl/fl	65.7	58.5	54	54.4	56.5
	CYP19A1(Tg)Cre; Cdh5fl/+	79	53.8	56.8	53	66.5	64.8
Cdh5 KO	CYP19A1(Tg)Cre; Cdh5fl/fl	34.5	41.9	41.7	45	51
P-value	0.000601795
Figure 1H
Embryo Weight (mg)
Control	Cdh5fl/+ or Cdh5fl/fl	72.8	74.4	82.5	96.6	69.9
	CYP19A1(Tg)Cre; Cdh5fl/+	72.8	82.6	75.9	76.6	77.2	96.7
Cdh5 KO	CYP19A1(Tg)Cre; Cdh5fl/fl	56.9	67.1	56.5	69.9	80.6
P-value	0.0353688
Figure 1M
Trophoblast / mm2
Control	Cdh5fl/+ or Cdh5fl/fl	33.3707	27.0782	28.4264	48.4219	30.4026
	CYP19A1(Tg)Cre; Cdh5fl/+	34.4678	39.6245	38.8175	38.1829	33.4074	39.304
Cdh5 KO	CYP19A1(Tg)Cre; Cdh5fl/fl	5.00136	7.56232	17.7403	21.9299	12.4925
P-value	0.000451074
Figure 1N
Trophoblast Invasion Depth (um)
Control	Cdh5fl/+ or Cdh5fl/fl	334.31	286.5	231.06	315.31	183.22
	CYP19A1(Tg)Cre; Cdh5fl/+	274.95	243.07	265.01	269.82	389.61	353.08
Cdh5 KO	CYP19A1(Tg)Cre; Cdh5fl/fl	96.98	71.4	137.33	144.81	166.52
P-value	2.91489e-05
Figure 1O
Endomucin+ Area (%)
Control	Cdh5fl/+ or Cdh5fl/fl	6.94756	6.51608	6.52623	4.67402	8.42221
	CYP19A1(Tg)Cre; Cdh5fl/+	6.69808	6.4765	5.00693	7.83886	5.30594	6.14988
Cdh5 KO	CYP19A1(Tg)Cre; Cdh5fl/fl	7.42218	6.58134	6.81094	7.31764	6.6062
P-value	0.187606
