# Supplementary material for: VE-cadherin enables trophoblast endovascular invasion and spiral artery remodeling during placental development
Source: eLife. 2022 Apr 29;11:e77241. doi: 10.7554/eLife.77241 (PMC9106330; doi:10.7554/eLife.77241)
Supplement: Figure 2—source data 1. [file elife-77241-fig2-data1.xlsx]

## Sheet: Figure 2
Figure 2B
aSMA+ Cells / SA
Control	Cdh5fl/+ or Cdh5fl/fl	0.75	1.26667	0.777778	1.36364	0.555556
	CYP19A1(Tg)Cre; Cdh5fl/+	1	0.73913	0.65	0.818182	0.684211	1.33333
Cdh5 KO	CYP19A1(Tg)Cre; Cdh5fl/fl	3.55556	3	3.88235	4.3125	3.57143
P-value	4.66694e-05
Figure 2C
SA Lumen Diameter (um)
Control	Cdh5fl/+ or Cdh5fl/fl	118.096	108.308	97.692	120.778	73.316
	CYP19A1(Tg)Cre; Cdh5fl/+	103.098	109.196	128.78	105.87	102.594	80.518
Cdh5 KO	CYP19A1(Tg)Cre; Cdh5fl/fl	49.596	49.116	86.03	70.98	89.3
P-value	0.00961
Figure 2F
EC Displacement by Trophoblasts (%)
Control	Cdh5fl/+ or Cdh5fl/fl	67.5275	51.7519	38.6129	84.6941	49.5661
	CYP19A1(Tg)Cre; Cdh5fl/+	72.4187	78.8264	46.1242	72.9107	56.5392
Cdh5 KO	CYP19A1(Tg)Cre; Cdh5fl/fl	15.4362	12.0215	12.5536	9.10443	13.34
P-value	2.07759e-06
