# Supplementary material for: VE-cadherin enables trophoblast endovascular invasion and spiral artery remodeling during placental development
Source: eLife. 2022 Apr 29;11:e77241. doi: 10.7554/eLife.77241 (PMC9106330; doi:10.7554/eLife.77241)
Supplement: Figure 3—source data 1. [file elife-77241-fig3-data1.xlsx]

## Sheet: Figure 3
Figure 3C
Resistance Index
Control	Cdh5fl/+ or Cdh5fl/fl	0.866379	0.912504	0.774772	1.21052	0.837056	0.7626	0.787232
	CYP19A1(Tg)Cre; Cdh5fl/+	0.691011	0.71821	0.828834
Cdh5 KO	CYP19A1(Tg)Cre; Cdh5fl/fl	1.32813	1.18072	1.51612	1.58634
P-value	0.00352577
Figure 3D
Pulsatility Index
Control	Cdh5fl/+ or Cdh5fl/fl	1.52852	1.67817	1.2647	3.06664	1.43955	1.23258	1.29824
	CYP19A1(Tg)Cre; Cdh5fl/+	1.05579	1.12063	1.4154
Cdh5 KO	CYP19A1(Tg)Cre; Cdh5fl/fl	3.95355	2.88231	6.2665	7.66972
P-value	0.0407757
Figure 3E
Fetal Heart Rate
Control	Cdh5fl/+ or Cdh5fl/fl	166.667	133.333	130.435	77.9221	139.535	206.897	181.818
	CYP19A1(Tg)Cre; Cdh5fl/+	171.429	125	193.548
Cdh5 KO	CYP19A1(Tg)Cre; Cdh5fl/fl	93.75	86.9565	136.364	66.6667
P-value	0.0193384
