# Supplementary material for: VE-cadherin enables trophoblast endovascular invasion and spiral artery remodeling during placental development
Source: eLife. 2022 Apr 29;11:e77241. doi: 10.7554/eLife.77241 (PMC9106330; doi:10.7554/eLife.77241)
Supplement: Figure 4—figure supplement 1—source data 1. [file elife-77241-fig4-figsupp1-data1.xlsx]

## Sheet: Fig 4-Fig Supp 1
Figure 4-Figure Supp 1A
Mmp15 mRNA Fold Change
Control	Cdh5fl/+ or Cdh5fl/fl	1.04573	0.880851
	CYP19A1(Tg)Cre; Cdh5fl/+	1.08562
Cdh5 KO	CYP19A1(Tg)Cre; Cdh5fl/fl	0.460117	0.381367	0.318161
P-value	0.00218399
Figure 4-Figure Supp 1D
Laminin Mean Fluorescence Intensity (Fold Change)
Control	Cdh5fl/+ or Cdh5fl/fl	0.808178	0.88209	0.92053	1.31058	1.15346
	CYP19A1(Tg)Cre; Cdh5fl/+	0.788211	0.964842	1.08198	1.04261	1.04043	1.00708
Cdh5 KO	CYP19A1(Tg)Cre; Cdh5fl/fl	1.32357	1.65244	1.28089	1.67418	1.35594
P-value	0.00262638
Figure 4-Figure Supp 1F
Vinculin Mean Fluorescence Intensity (Fold Change)
Control	Cdh5fl/+ or Cdh5fl/fl	1.0312	1.2071	0.887323
	CYP19A1(Tg)Cre; Cdh5fl/+	0.874382
Cdh5 KO	CYP19A1(Tg)Cre; Cdh5fl/fl	0.263142	0.284774	0.592447
P-value	0.009532
