# Supplementary material for: VE-cadherin enables trophoblast endovascular invasion and spiral artery remodeling during placental development
Source: eLife. 2022 Apr 29;11:e77241. doi: 10.7554/eLife.77241 (PMC9106330; doi:10.7554/eLife.77241)
Supplement: Figure 4—figure supplement 2—source data 1. [file elife-77241-fig4-figsupp2-data1.xlsx]

## Sheet: Fig 4-Fig Supp 2
Figure 4-Figure Supp 2B
DBA+ Cells/mm2
Control	Cdh5fl/+ or Cdh5fl/fl	210.578	193.41	187.735	126.345	165.305
	CYP19A1(Tg)Cre; Cdh5fl/+	203.316	149.607	176.356	158.777	142.238	172.269
Cdh5 KO	CYP19A1(Tg)Cre; Cdh5fl/fl	476.531	414.578	402.708	267.93	214.2
P-value	0.0189856
Figure 4-Figure Supp 2C
Cleaved Caspase 3+ cells/mm2
Control	Cdh5fl/+ or Cdh5fl/fl	90.588	78.2713	53.2779	45.5162	130.073
	CYP19A1(Tg)Cre; Cdh5fl/+	89.4678	90.22	82.3651	75.1497	94.9249	82.9898
Cdh5 KO	CYP19A1(Tg)Cre; Cdh5fl/fl	43.805	28.051	22.2954	31.2002	33.5796
P-value	9.82396e-06
